# Supplementary material for: Cryo-EM structure of the monomeric Rhodobacter sphaeroides RC–LH1 core complex at 2.5 Å
Source: Oxford University Press journal article supplement (doi:10.1042/bcj20210631), 2021-09-30
Supplement: bcj-2021-0631_supp.pdf [file bcj-2021-0631_supp.pdf]

## Supplementary material

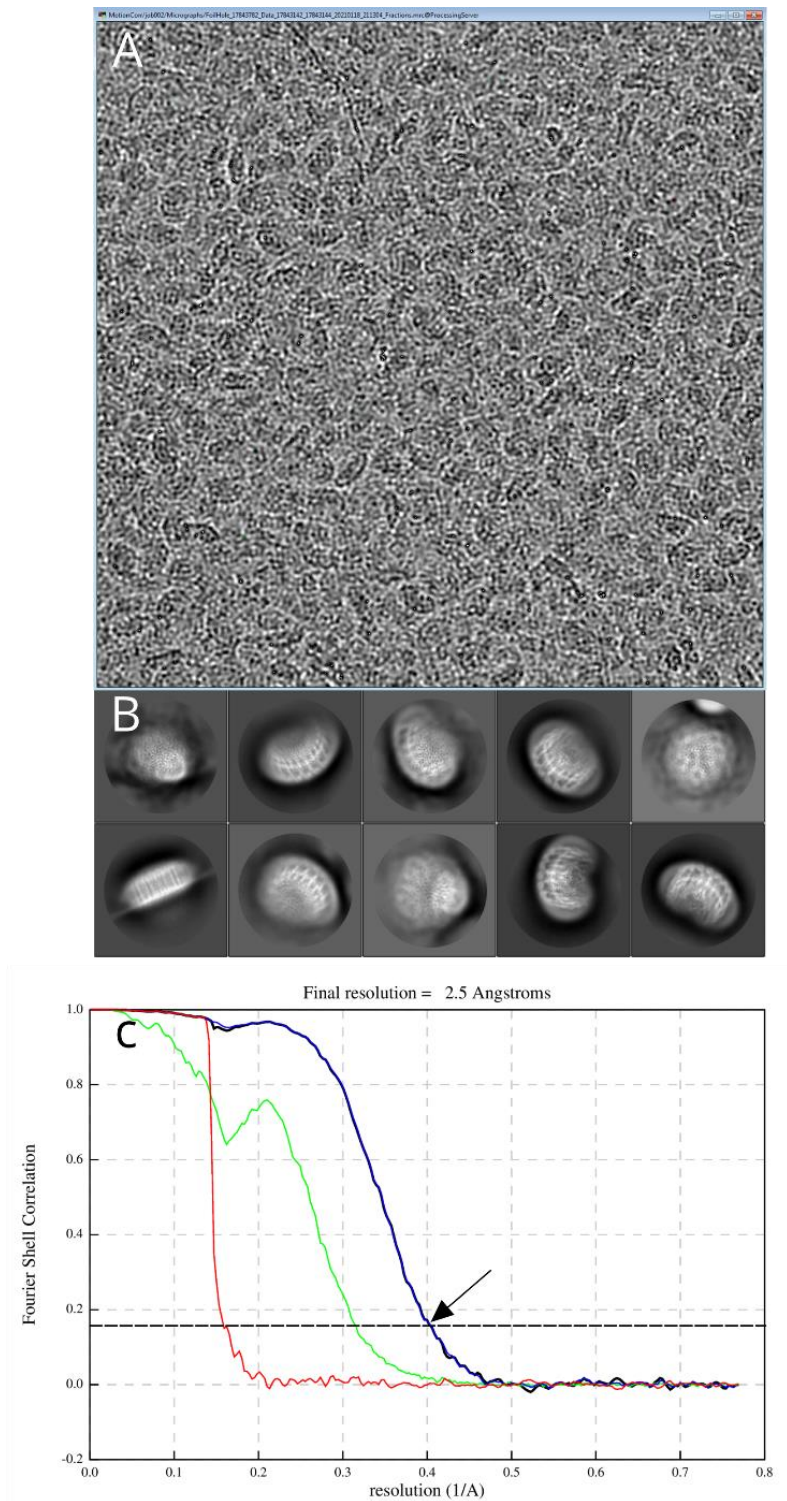

**Figure S1.** Cryo-EM image of the RC-LH1-PufXY complex from *Rba. sphaeroides* and resolution calculation of 3D map of the complex. (A) A selected cryo-EM micrograph after motion correction. The pixel size of the image is 4k x 4k, corresponding to 266 x 266 nm at the specimen level. A sigma contrast of 3 was applied. (B) Selected 2D classes, box size 25 nm, showing different views of the complex. (C) Fourier shell correlations (black, corrected; green, unmasked; blue, masked; red, phase randomised). The dashed line shows 0.143 FSC, with an arrow pointing to the global resolution of the map at 2.5 Å.

MPEVSEFAFRLMMAAVIFVGVGIMFAFAGGHWFVGLVVGGLVAAFFAATPNSN



The image shows a single line of amino acid sequence: MPEVSEFAFRLMMAAVIFVGVGIMFAFAGGHWFVGLVVGGLVAAFFAATPNSN. The sequence is rendered in blue text. There are three red horizontal lines underlining specific segments of the sequence: the first line is under 'FRLMMAAVI', the second line is under 'FVGVGIMFAFAGGHWF', and the third line is under 'VGLVVGGLVAAFFAAT'. The underlines are slightly offset from each other, with the second and third lines starting further to the left than the first line.

**Figure S2.** Identification of Rsp\_7571 (proposed name: protein Y) in isolated RC-LH1 complexes by mass spectrometry. Proteolytic peptides generated by pepsin and identified by database searching are indicated by red lines. Amino acids in blue are fitted into the cryo-EM map.

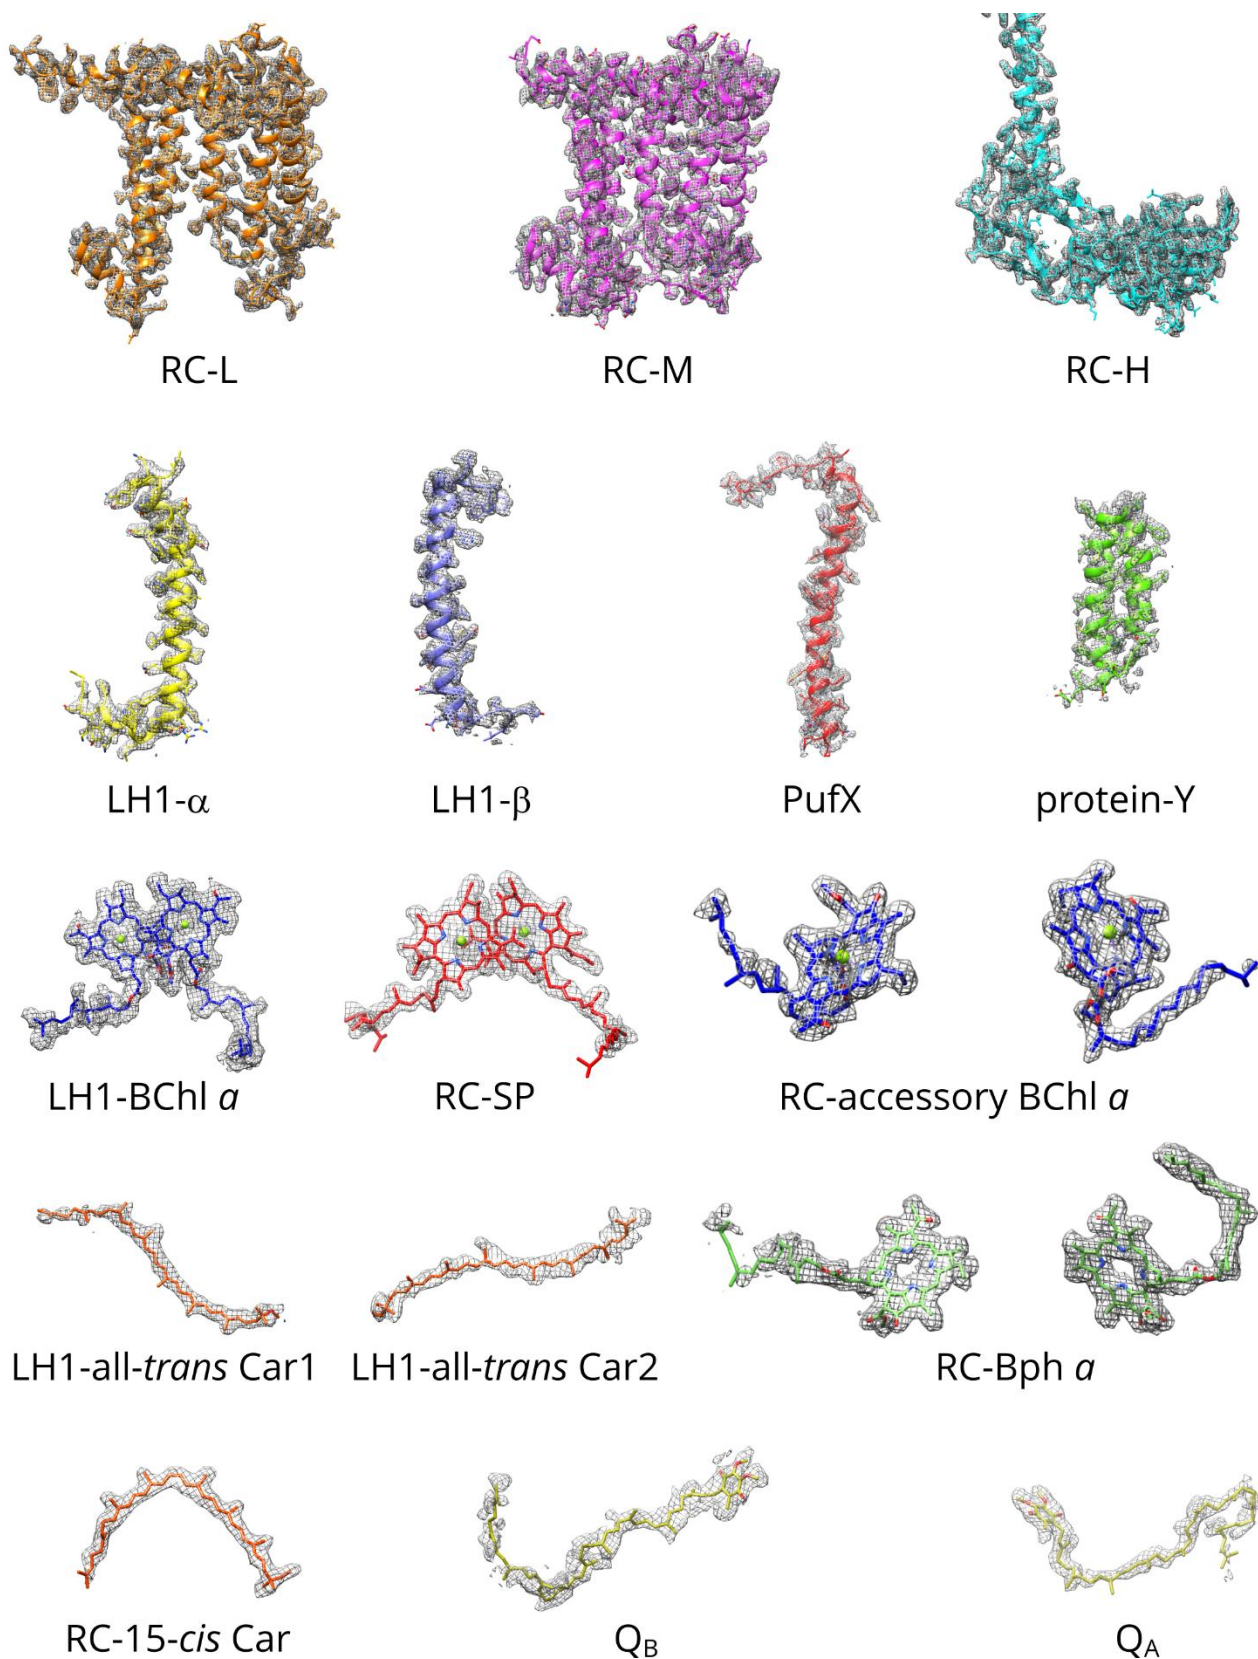

**Figure S3.** Cryo-EM densities and structural models of polypeptides and pigments in the monomeric RC-LH1 complex from *Rba. sphaeroides*. Atomic models of components of the complexes are fitted into their respective density maps, taken from the final refined model. RC-SP are the reaction centre special pair of BChls.

A

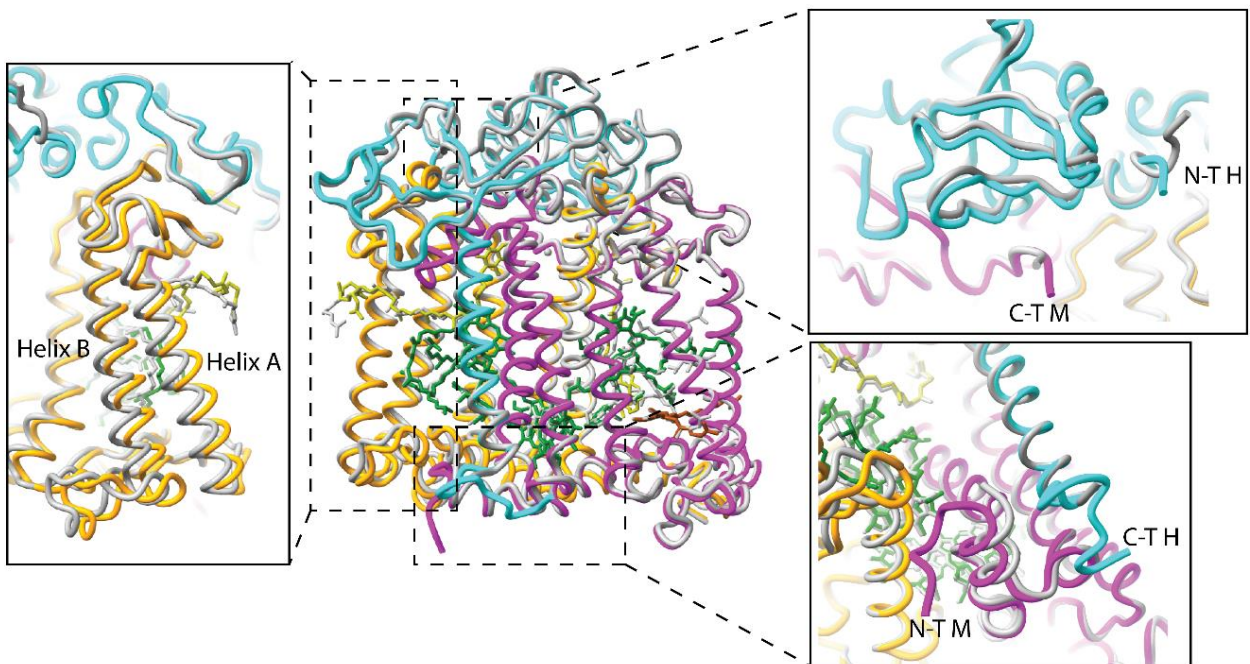

B

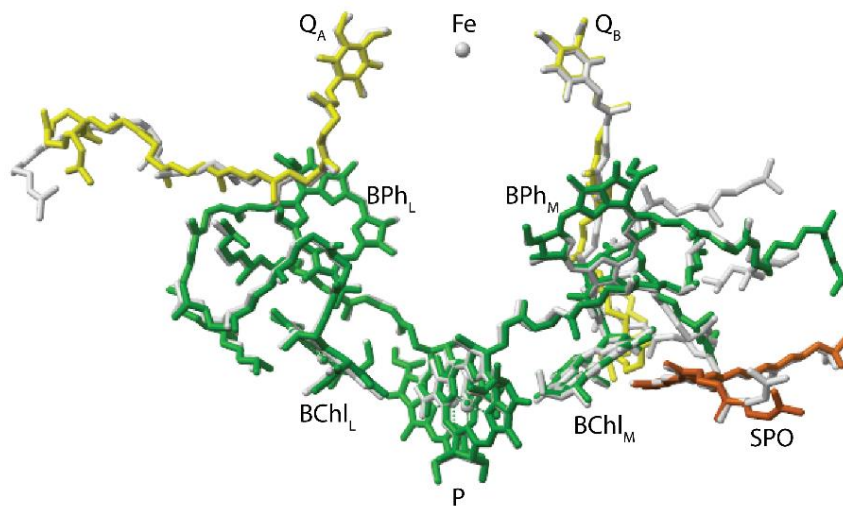

**Figure S4.** Comparison between RC structures obtained from cryo-EM of the RC-LH1-PufXY complex. (A) Overlaid structures from cryo-EM (RC-L magenta; RC-M, orange; RC-H, cyan), and a structure (314D) obtained using X-ray crystallography (grey). Three regions are highlighted in boxes to show the small deviations between the structures. N-T and C-T indicate N- and C-termini, respectively. (B) Overlaid pigments and cofactors, with those from 314D in grey.



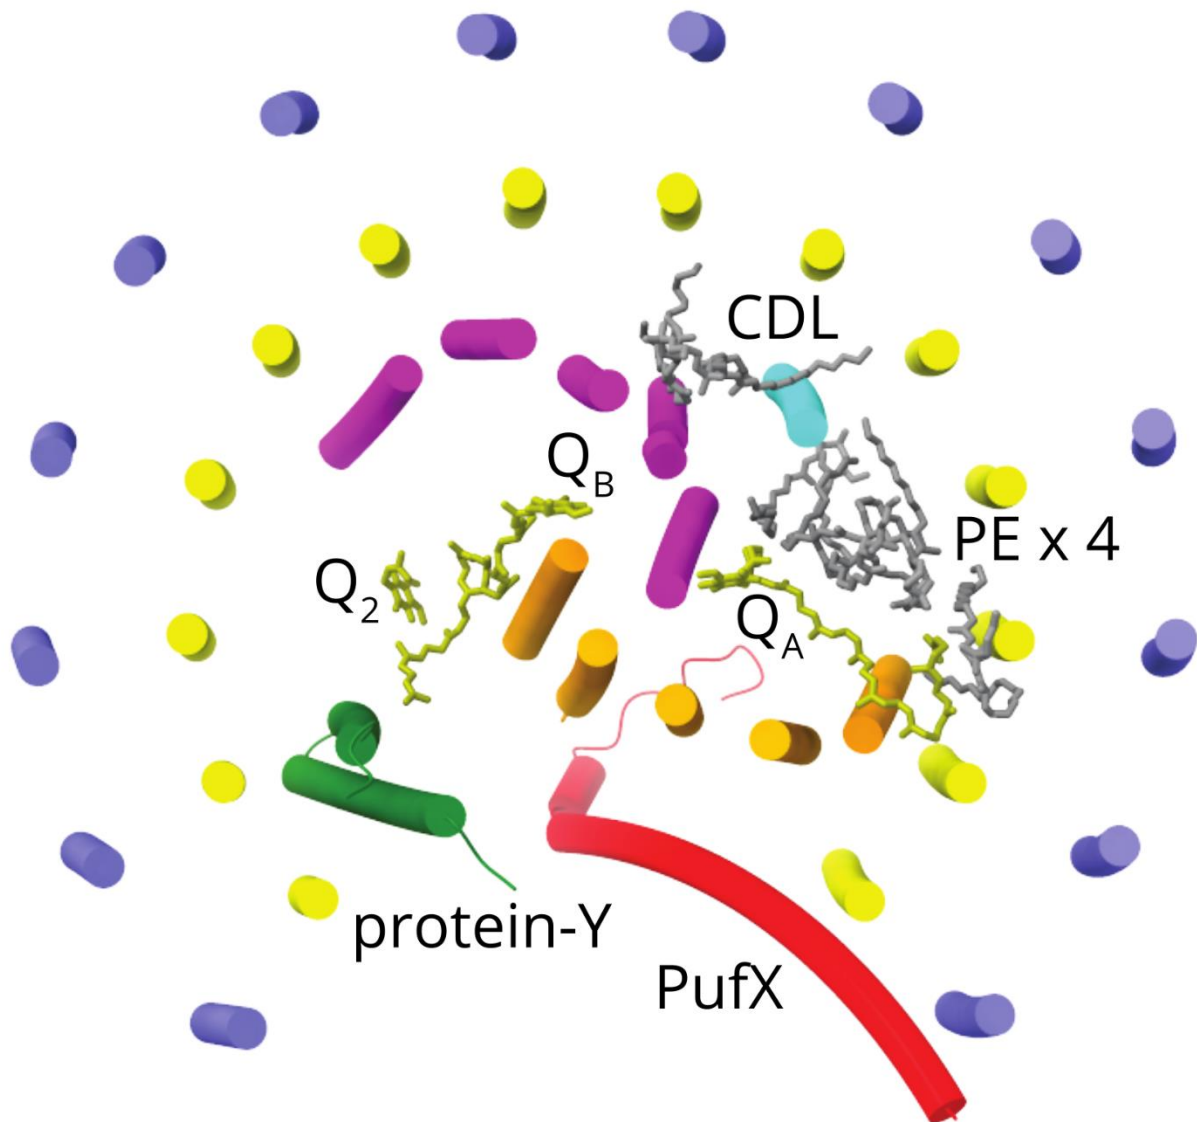

**Fig. S5.** Projection view of the RC-LH1 monomer complex of *Rba. sphaeroides* in a simplified form that omits LH1 and RC pigments, and which represents alpha helices as coloured tubes. The colours are LH1  $\alpha$  (yellow), LH1 $\beta$  (blue) RC-L orange), RC-M (magenta), quinones (dark yellow) and lipids (grey). CDL is cardiolipin and PE is phosphatidyl ethanolamine.  $Q_A$  and  $Q_B$  are quinones bound to sites in the RC and  $Q_2$  is a quinone with no protein binding site.

A

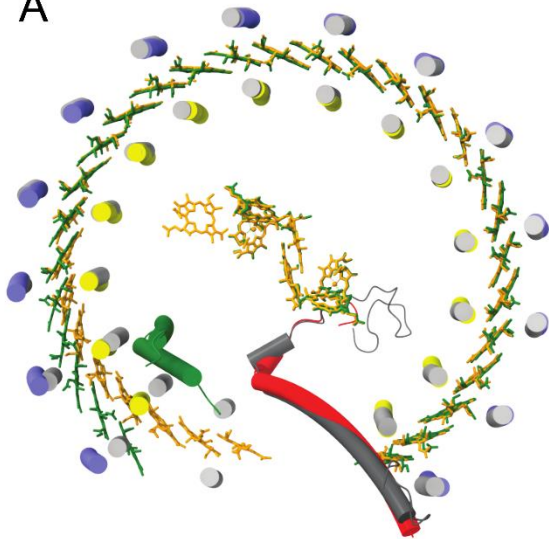

*Rba. sphaeroides* RC-LH1<sub>14</sub>-XY (coloured) vs  
*Rba. veldkampii* RC-LH1<sub>15</sub>-PufX (grey).

B

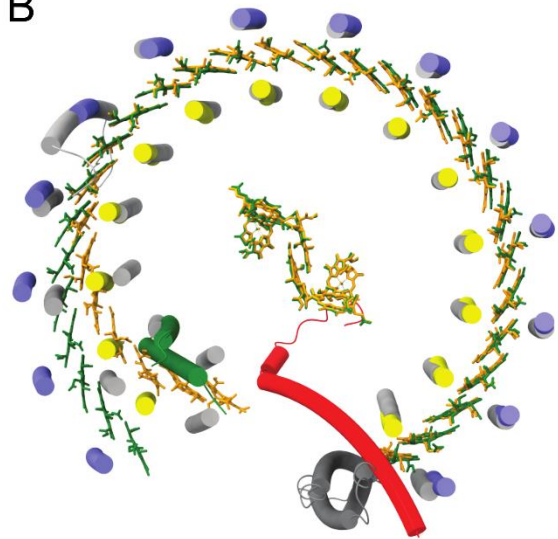

*Rba. sphaeroides* RC-LH1<sub>14</sub>-XY (coloured) vs  
*Rps. palustris* RC-LH1<sub>14</sub>-W (grey).

**Figure S6.** Comparison between the LH1 rings of *Rba. sphaeroides*, *Rba. veldkampii* and *Rps. palustris*. In each case, the coloured structure and green BChls are from *Rba. sphaeroides*, and the other complex is in grey, with orange BChls and RC pigments. (A) The two PufX structures align well, and the *Rba. veldkampii* BChls form a more extensive ring. Protein Y is in green. (B) Comparison with the core complex variant of *Rps. palustris* with 15  $\alpha\beta$  subunits and protein-W (grey).

**Table S1: Cryo-EM data acquisition, model refinement and validation statistics.**

|                                                                   |                              |
|-------------------------------------------------------------------|------------------------------|
| <b>Protein source</b>                                             | Photosynthetic bacterium     |
| <b>Data collection and processing</b>                             |                              |
| Microscope                                                        | ThermoFisher Titan Krios G3i |
| Voltage (kV)                                                      | 300                          |
| Camera                                                            | Falcon 4                     |
| Energy filter                                                     | No                           |
| Energy filter slit width                                          | No                           |
| Magnification                                                     | 120,000                      |
| Defocus range ( $\mu\text{m}$ )                                   | -0.8 to -2.2                 |
| Mean defocus ( $\mu\text{m}$ )                                    | -1.8                         |
| Pixel size ( $\text{\AA}$ )                                       | 0.65                         |
| Electron flux ( $e^-/\text{\AA}^2/\text{s}$ )                     | 3.71                         |
| Electron fluence ( $e^-/\text{\AA}^2$ )                           | 44.99                        |
| Exposure time (sec/frame)                                         | 0.29                         |
| Electron fluence per frame ( $e^-/\text{\AA}^2/\text{frame}$ )    | 1.07                         |
| Number of frames per movie                                        | 42                           |
| Number of movies used                                             | 4859                         |
| Initial no. particle images                                       | 1,057,624                    |
| Final no. particle images                                         | 250,613                      |
| Symmetry imposed                                                  | C1                           |
| Local resolution range                                            | 2.4 to 2.6                   |
| Resolution of unmasked reconstruction ( $\text{\AA}$ , FSC=0.143) | 3.1                          |
| Resolution of masked reconstruction ( $\text{\AA}$ , FSC=0.143)   | 2.5                          |
| Specimen temperature                                              | $\sim 80\text{K}$            |
| Particle box size                                                 | (512 px) <sup>2</sup>        |
| <b>Refinement and validation</b>                                  |                              |
| Refinement package                                                | COOT, ISOLDE, PHENIX         |
| Initial model                                                     | PDB 4V9G                     |
| Model resolution ( $\text{\AA}$ , FSC=0.5)                        | 2.5                          |
| Map sharpening B factor ( $\text{\AA}^2$ )                        | -55.07                       |
| <b>Model composition</b>                                          |                              |
| Non-hydrogen atoms                                                | 22483                        |
| Protein residues                                                  | 2291                         |
| Molecular weight (kD)                                             | 315.8                        |
| Protein B factor ( $\text{\AA}^2$ )                               | 23.6                         |
| <b>RMS deviations</b>                                             |                              |
| Bond length ( $\text{\AA}$ )                                      | 0.004                        |
| Bond angle ( $^\circ$ )                                           | 0.893                        |
| <b>Validation</b>                                                 |                              |
| MolProbity score                                                  | 9.5                          |
| Clashscore                                                        | 1.9                          |
| Rotamer outliers (%)                                              | 0.21                         |
| EMRinger score                                                    | 5.68                         |
| Cb deviations (%)                                                 | 0.00                         |
| CaBLAM outliers (%)                                               | 0.6                          |
| <b>Ramachandran plot</b>                                          |                              |
| Favoured (%)                                                      | 98.34                        |
| Allowed (%)                                                       | 1.66                         |
| Disallowed (%)                                                    | 0.00                         |
| Ramachandran Z-score                                              | 1.06                         |
| <b>PDB ID</b>                                                     | 7PIL                         |
| <b>EMDB ID</b>                                                    | EMD-13441                    |
